# Supplementary figures and images for: Study on the mechanism of mitigating radiation damage by improving the hematopoietic system and intestinal barrier with Tenebrio molitor peptides
Source: Royal Society of Chemistry journal article supplement (doi:10.1039/d4fo01141d), 2024-01-01

### Supplementary diagram

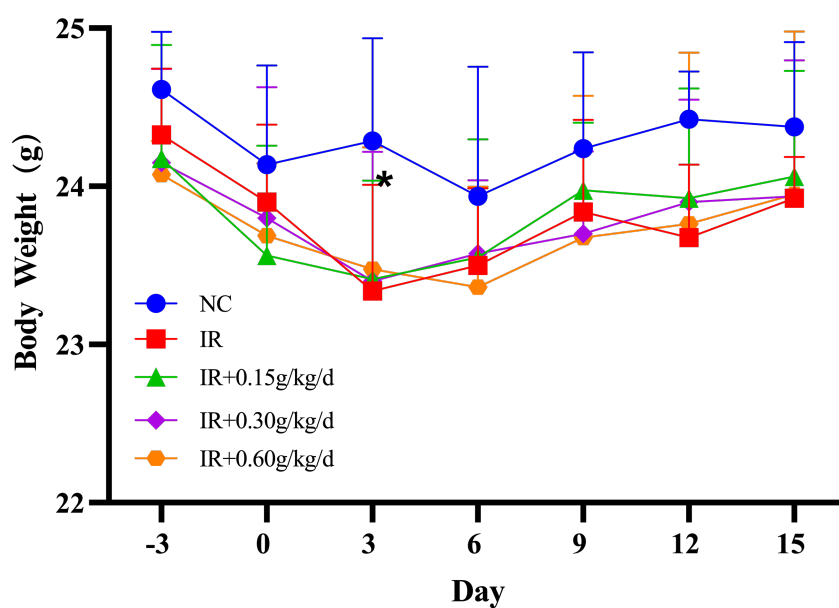

Fig. S Effect of TMP on the body weight of irradiated mice

Supplement: d4fo01141d1.pdf [file d4fo01141d1.pdf]
